# Supplementary material for: Kinetic and thermodynamic aspects of the chain-breaking antioxidant activity of ascorbic acid derivatives in non-aqueous media
Source: Royal Society of Chemistry journal article supplement (doi:10.1039/c1ob05334e), 2011-01-01
Supplement: c1ob05334e.pdf [file c1ob05334e.pdf]

**Kinetic and thermodynamic aspects of the chain-breaking antioxidant activity of ascorbic acid derivatives in non-aqueous media**

Riccardo Amorati, Gian Franco Pedulli and Luca Valgimigli

*University of Bologna, Department of organic Chemistry "A. Mangini", via S. Giacomo 11, 40126 Bologna Italy.*

ELECTRONIC SUPPLEMENTARY INFORMATION

| Content:                                                              | page |
|-----------------------------------------------------------------------|------|
| Figures S1-S4 (EPR spectra and simulations)                           | 2    |
| Table S1-S3 and Figures S5-S7 (Results from theoretical calculations) | 5    |
| Figure S8-S9 (Autoxidation results)                                   | 8    |

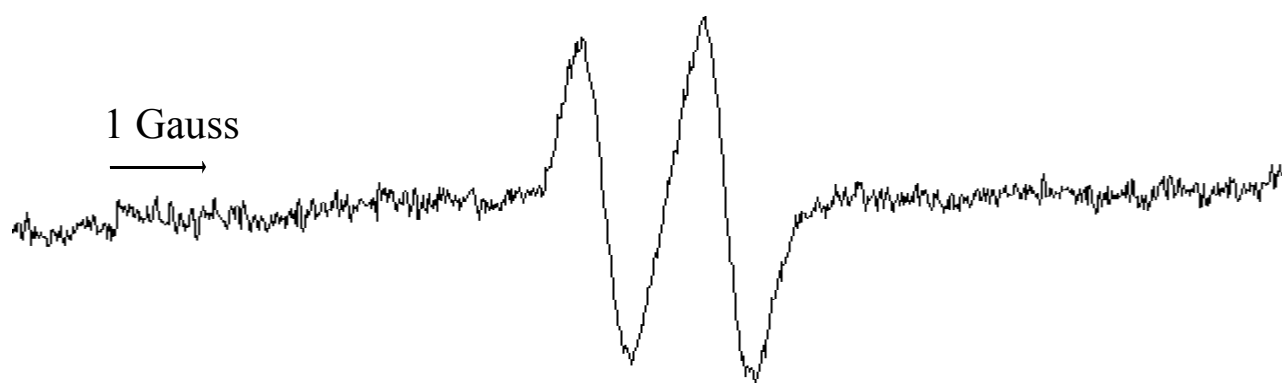

**Figure S1.** Experimental X-band EPR spectrum (of the ascorbate radical anion) recorded upon continuous UV irradiation at 298K of a solution of ascorbyl palmitate in *tert*-butanol, containing 5% (v/v) di-*tert*-butylperoxide. The visible HFSC is  $a(H)=1.7G$ ; measured line-width is  $LW=0.5G$  ( $g = 2.0054$ ).

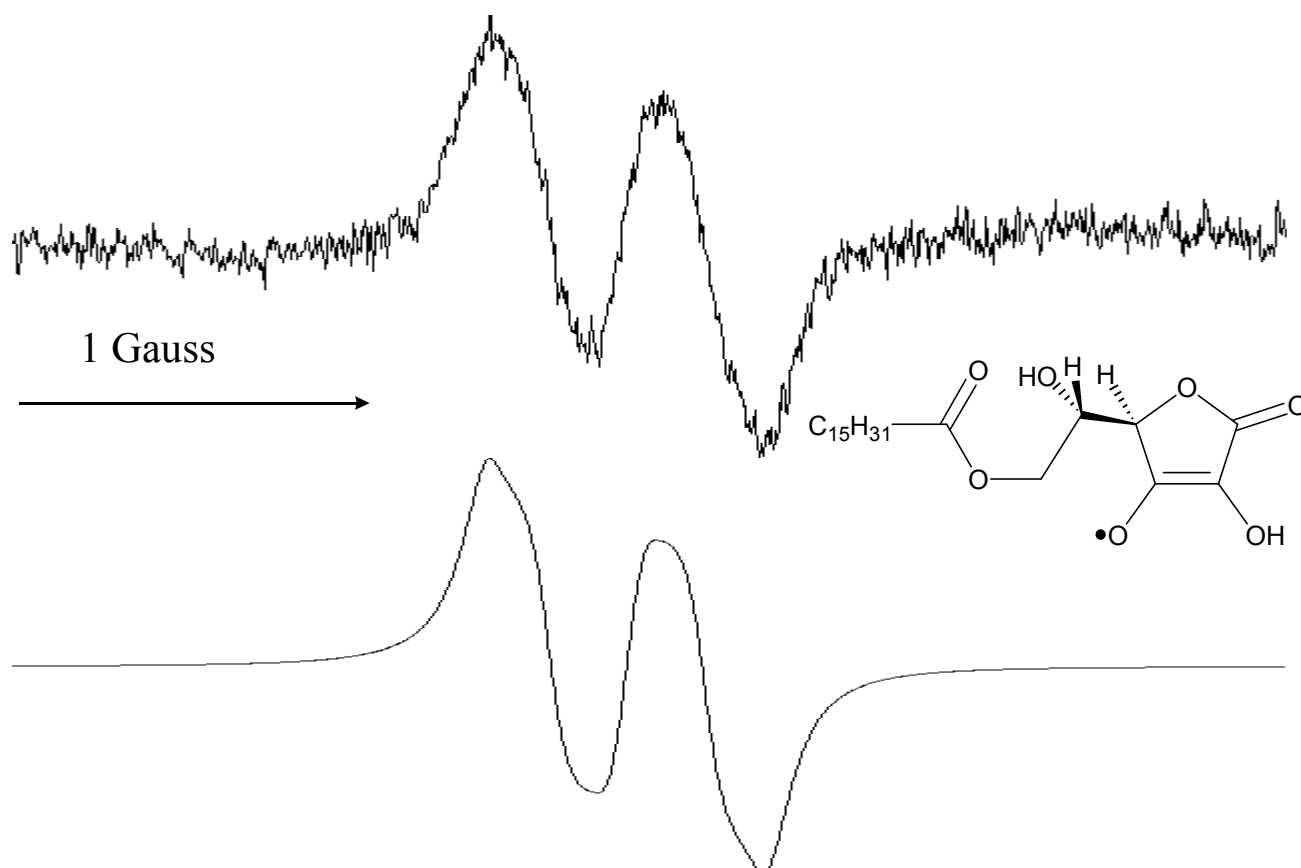

**Figure S2.** Experimental (top) and simulated (bottom) X-band EPR spectrum of the ascorbyl radical recorded upon continuous UV irradiation at 310K of a solution of ascorbyl palmitate in *tert*-butanol, containing 5% (v/v) di-*tert*-butylperoxide and 5% (v/v) concentrated (36% in water) hydrochloric acid ( $g=2.0050$ ).

Simulation was obtained with the following parameters:  $a(H)=0.45G$ ;  $a(H)=0.14G$ ;  $a(H)=0.11G$ ;  $a(H)=0.05G$ ;  $LW = 0.28G$ .

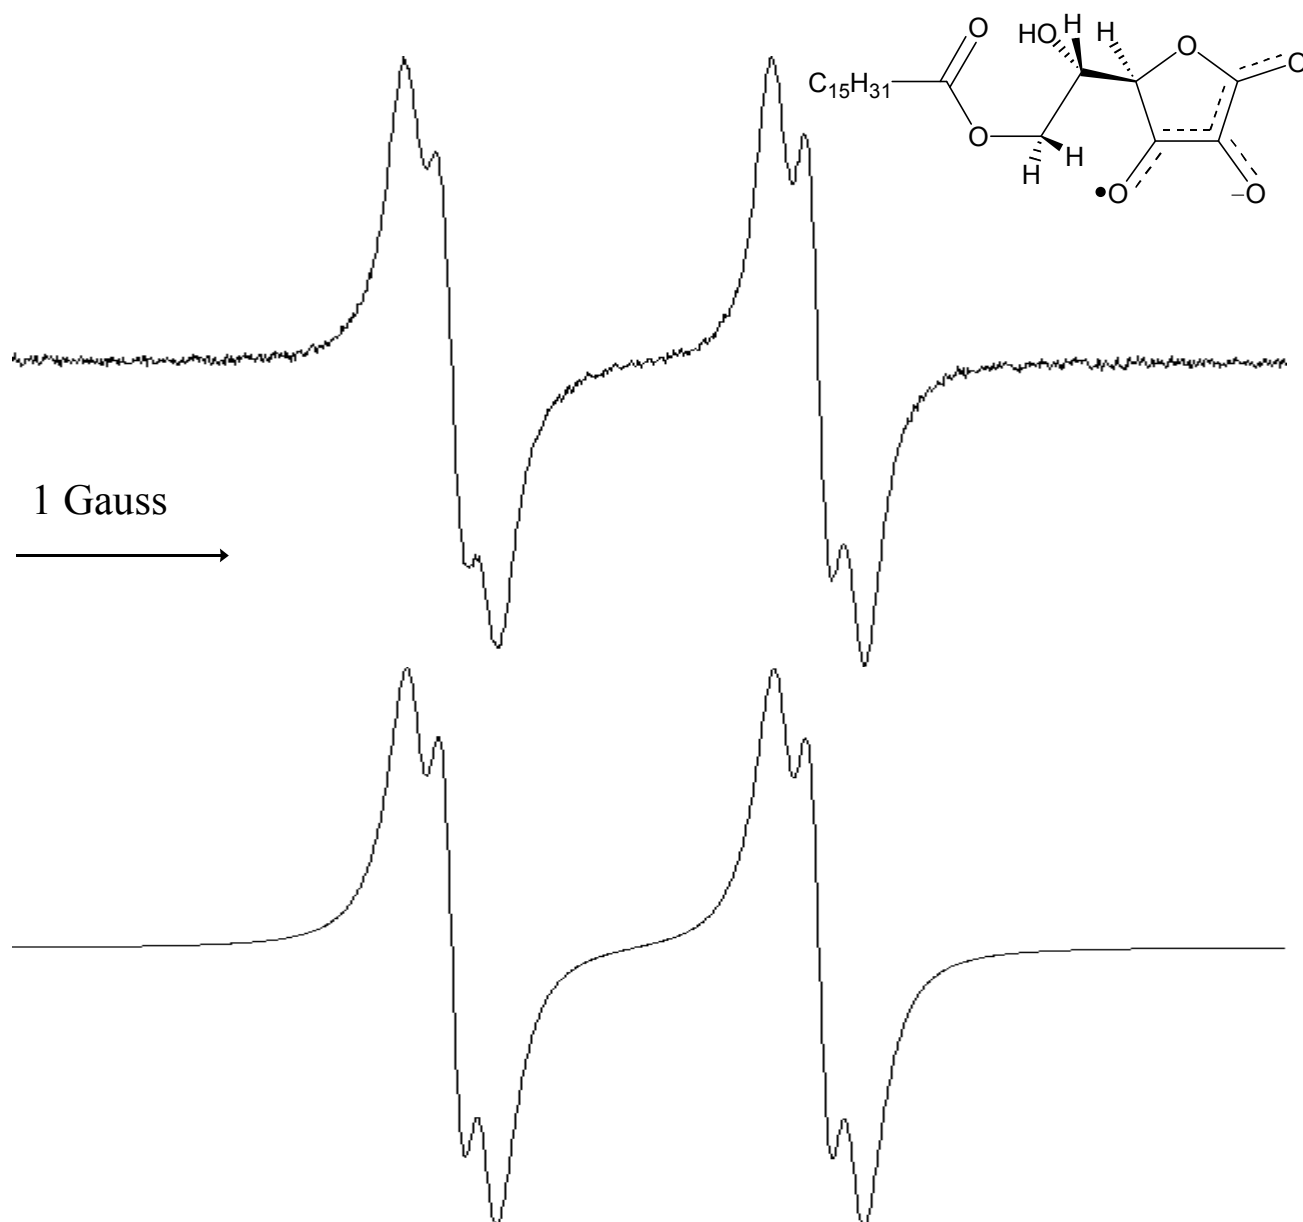

**Figure S3.** Experimental (top) and simulated (bottom) X-band EPR spectrum of the ascorbate radical anion recorded upon short (5 sec) UV irradiation at 310K of a 3mM solution of ascorbyl palmitate in *tert*-butanol, containing 3mM DBU (1 equiv.) and 5% (v/v) di-*tert*-butylperoxide ( $g=2.0054$ ).

Simulation was obtained with the following parameters:  $a(H)=1.85G$ ;  $a(H)=0.18G$ ;  $a(H)=0.16G$ ;  $a(H)=0.05G$ ;  $LW = 0.22G$ .

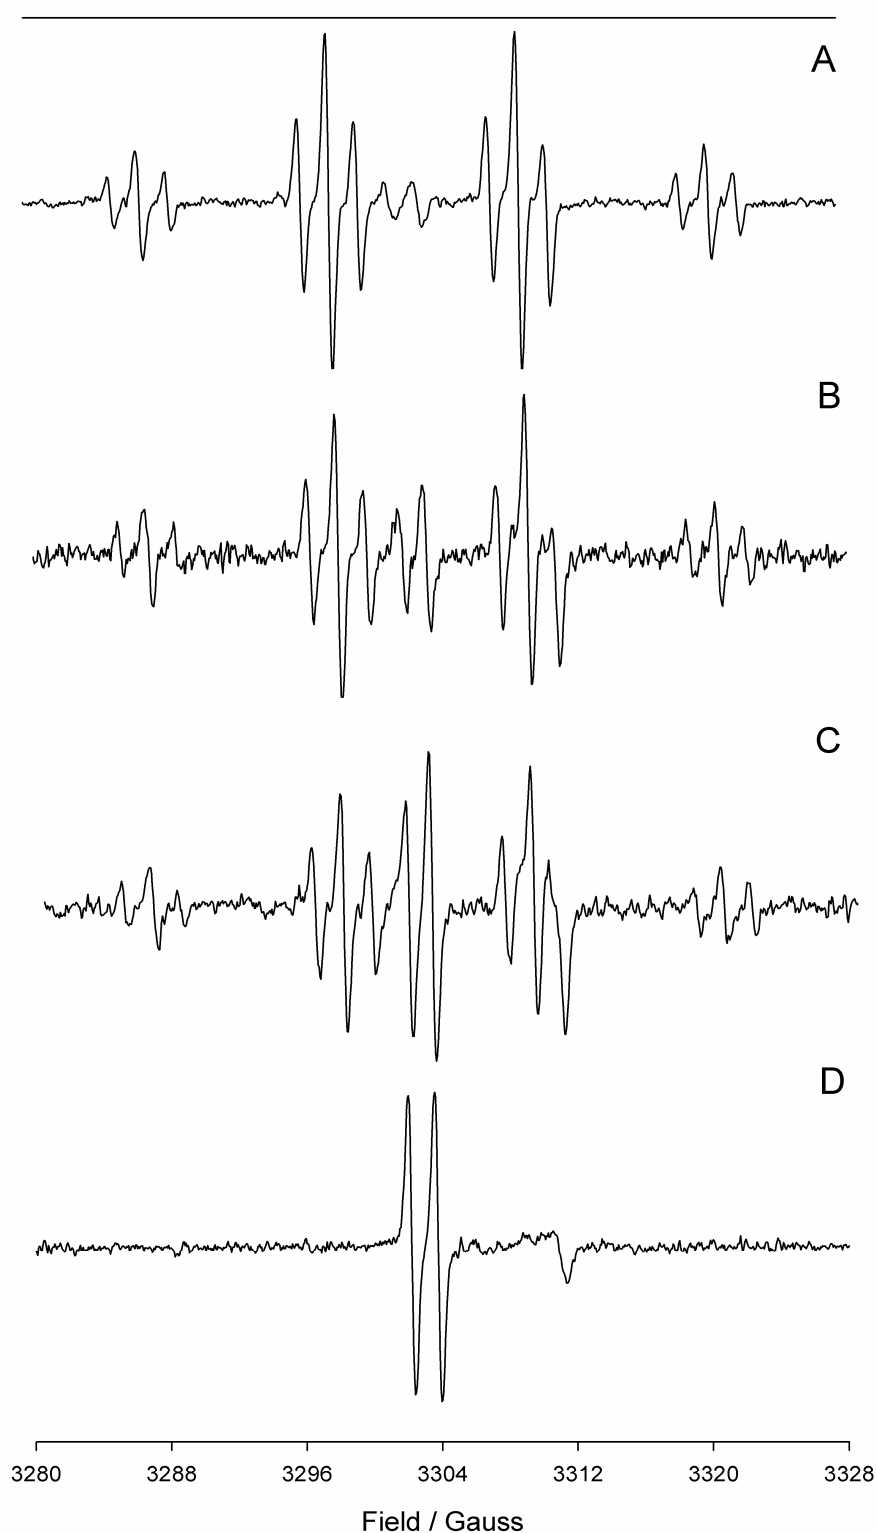

**Figure S4.** Experimental X-band EPR spectra recorded upon continuous UV irradiation at 298K of a mixture of ascorbyl palmitate (22 mM) and 2,6-di-*tert*-butyl-4-methylphenol (12 mM) in *tert*-butanol, containing: (A) 5% (v/v) di-*tert*-butylperoxide; (B) 5% (v/v) di-*tert*-butylperoxide and 3% (v/v) pyridine; (C) 5% (v/v) di-*tert*-butylperoxide and 7% (v/v) pyridine; (D) 5% (v/v) di-*tert*-butylperoxide and 7% (v/v) triethylamine.

**Table S1.** Sum of electronic and thermal enthalpies for the model of ascorbic acid  $4H_2$  and relative energies of the conformers for its molecule and radical in the various protonation states. All calculations are at the B3LYP/6-31g+(d,p) level.

|                       |                                                                                     | E+H (Hartree) | $\Delta H$ (kcal/mol) |
|-----------------------|-------------------------------------------------------------------------------------|---------------|-----------------------|
| Closed-shell molecule | 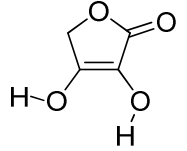   | -455.638582   | +7.1                  |
|                       | 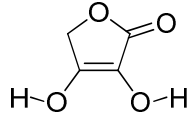   | -455.643475   | +4.0                  |
|                       | 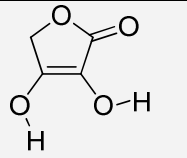   | -455.649842   | 0                     |
| Neutral radical       | 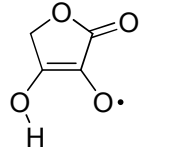  | -455.025314   | +4.3                  |
|                       | 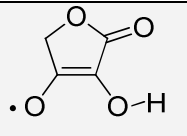 | -455.032194   | 0                     |
|                       | 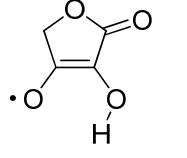 | -455.031465   | +0.5                  |
| anion <sup>a</sup>    | 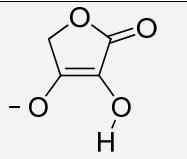 | -455.133200   | 0                     |
|                       | 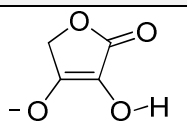 | -455.131628   | +1.0                  |
| Radical anion         | 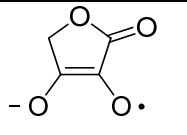 | 454.533082    |                       |

<sup>a</sup> In the anion, the  $H^+$  is lost from the 4-OH group, as reported in ref. 17.

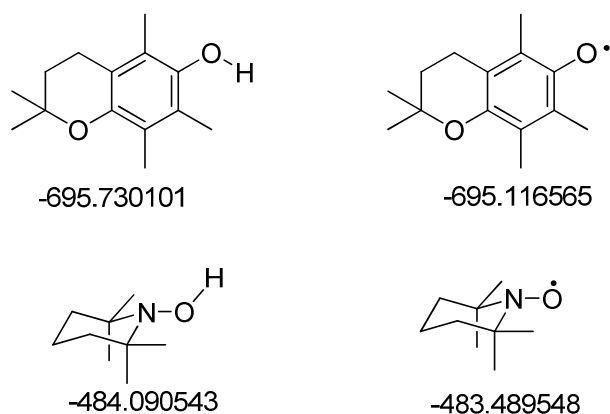

**Figure S5.** Sum of electronic and thermal enthalpies for PMHC (upper) and TEMPOH and for the respective radicals, at the B3LYP/6-31g+(d,p) level (in Hartree).

**Table S2.** Sum of electronic (E) and thermal enthalpies (H) for the simplified model of ascorbic acid **4H<sub>2</sub>**, donating a H-bond to acetonitrile, and relative energies for the different binding sites in its molecule and radical. All calculations are at the B3LYP/6-31g+(d,p) level.

|  |  | E+H (Hartree) | ΔH (kcal/mol) |
|--|--|---------------|---------------|
|  |  | -588.377236   | 0             |
|  |  | -588.373911   | +2.1          |
|  |  | -587.757662   | +2.6          |
|  |  | -587.761787   | 0             |

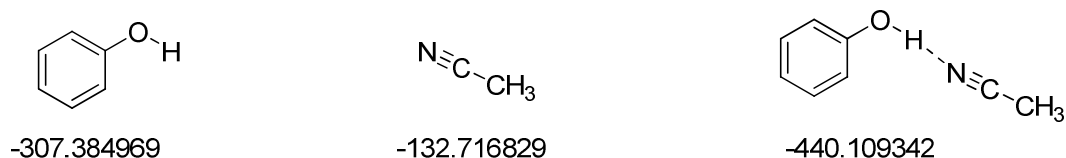

**Figure S6.** Sum of electronic and thermal enthalpies (Hartree) for phenol, acetonitrile and their complex.

**Table S3.** Differences between the total energies in solution for the investigated compounds and their radicals, calculated by using the polarized continuum model in MeCN, and with respect to TEMPOH.

|        | $-\Delta E$ / Hartree | $\Delta\Delta E$ resp TempoH / kcal/mol |
|--------|-----------------------|-----------------------------------------|
| TEMPOH | 0.613936              | -                                       |
| PMHC   | 0.624842              | +6.8                                    |
| AscH2  | 0.632735              | +11.8                                   |
| AscH-  | 0.615192              | +0.8                                    |

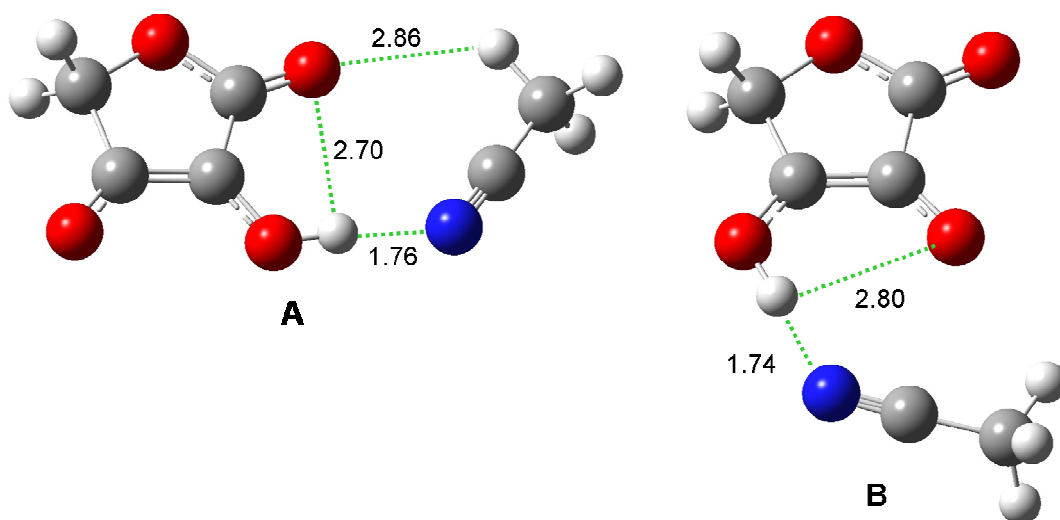

**Figure S7.** Optimized geometries (H-bond lengths are in Å) for the formation of the H-bond complex between **4H•** and acetonitrile.

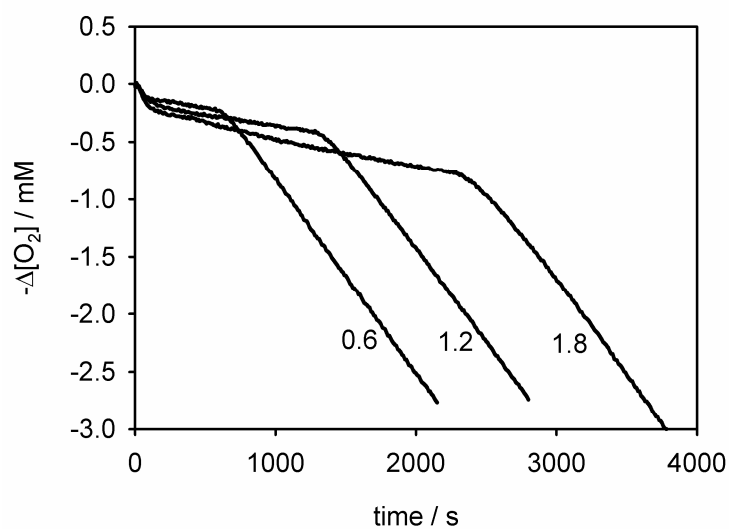

**Figure S8.** Oxygen consumption observed during the autoxidation of styrene (4.3 M) in MeCN initiated by AIBN (0.05 M) at 30 °C in the presence of acetic acid (44 mM) and of increasing amounts of **3H**<sub>2</sub> (10<sup>-5</sup> M).

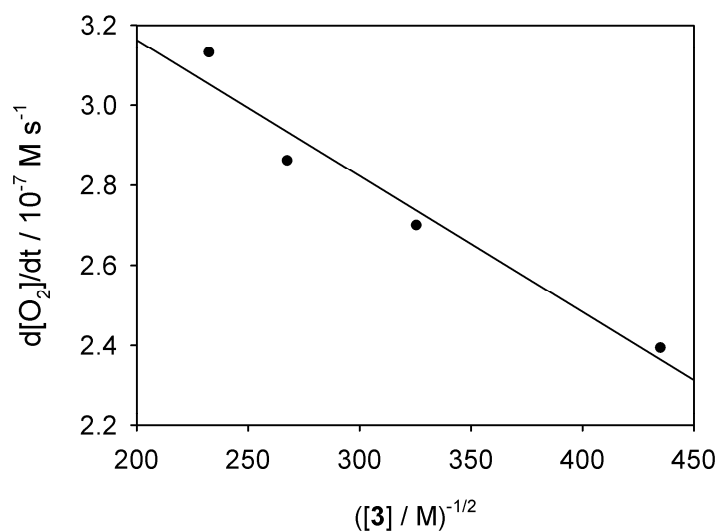

**Figure S9.** Dependence of the O<sub>2</sub> consumption rate during the inhibited period on the concentration of **3H**<sub>2</sub>, in the presence of pyridine 30 mM.
